# Supplementary material for: Knockdown of RhoE Expression Enhances TGF-β-Induced EMT (epithelial-to-mesenchymal transition) in Cervical Cancer HeLa Cells
Source: MDPI journal article supplement (doi:10.3390/ijms20194697), 2019-09-22
Supplement: s1 [file s1]

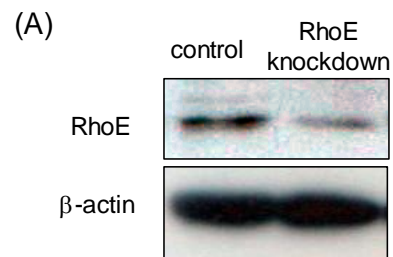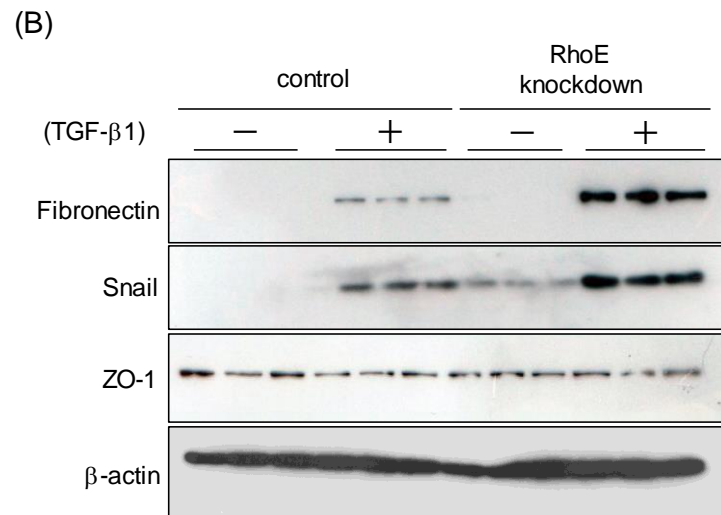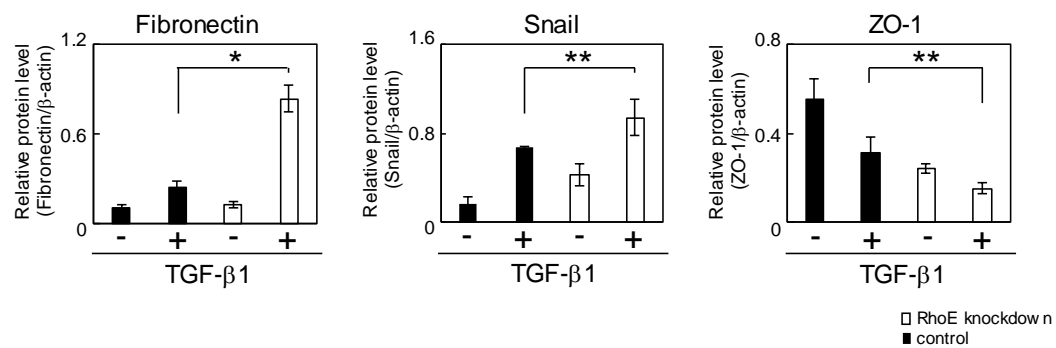

Supplementary Figure 1 Nishizuka *et al.*

**Supplementary Figure 1. RhoE knockdown using siRhoE-B changes the expression levels of EMT-related genes in HeLa cells.** (A) Knockdown efficiency of RhoE in HeLa cells. HeLa cells were transfected with siRhoE-B. Luciferase siRNA was used as a control and  $\beta$ -actin expression was used as a loading control. (B) Protein expression of fibronectin, Snail, and ZO-1 in HeLa cells transfected siRhoE-B. Cells were treated with 1 ng/mL TGF- $\beta$ 1 for 72 h. Whole-cell lysates were subjected to Western blot analysis and  $\beta$ -actin was used as a loading control. The three lanes represent triplicates using cell lysates prepared from different culture plates. Signal intensities of the proteins were quantified using NIH-Image software. Each column represents the mean and standard deviation of three independent experiments. Statistical significance was assessed using one-way ANOVA with post hoc Tukey–Kramer HSD test. \* $p < 0.01$  and \*\* $p < 0.05$ .
